# Supplementary material for: Macrophages promote endothelial-to-mesenchymal transition via MT1-MMP/TGFβ1 after myocardial infarction
Source: eLife. 2020 Oct 16;9:e57920. doi: 10.7554/eLife.57920 (PMC7609061; doi:10.7554/eLife.57920)
Supplement: Figure 1—figure supplement 2—source data 1. [file elife-57920-fig1-figsupp2-data1.xlsx]

## Sheet: Fig 1- Fig supplement 2C
	Monocytes (x103 / ml)			Neutrophils (x103 / ml)
	WT	MAC-Mmp14 KO		WT	MAC-Mmp14 KO
	65.443	99.6193		523.544	630.964
	80.538	76.4557		466.614	548.734
	81.3452	64.9351		607.614	352.597
	94.9871	45.443		381.362	252.152
	119.036	131.899		479.188	417.975
	76.6414	54.4444		452.273	469.722
	61.2923	113.202		452.295	589.606
	46.7372	115.61		542.769	679.284
	74.7024	109.564		594.94	480.501
		87.0434			688.642
Mean	77.858	89.8215		500.067	511.018

## Sheet: Fig 1- Fig supplement 2D
Mmp14 mRNA relative expression in BMDMs and sorted cardiac macrophages or ECs from WT and MAC-Mmp14 KO mice
BMDMs	Avg. Ct 36b4	Avg. Ct Mmp14	∆Ct	∆∆Ct	2^-∆∆Ct	Mean
WT	18.675	26.3519	7.67689	0.248921	0.841526	1.03444
	18.8637	26.5035	7.63984	0.211876	0.863414
	18.8824	26.5264	7.64407	0.216101	0.860889
	19.3298	26.6762	7.34643	-0.0815376	1.05815
	18.55	26.3459	7.79594	0.367971	0.774872
	19.1221	26.3396	7.21756	-0.210408	1.15702
	19.2819	25.957	6.67505	-0.752923	1.6852
MAC-Mmp14 KO	18.9215	28.1659	9.24442	1.81645	0.283919	0.247428
	18.8038	28.0667	9.26293	1.83496	0.280299
	18.9772	29.376	10.3988	2.97081	0.127555
	19.5642	27.7576	8.19338	0.765412	0.588285
	19.3018	28.1134	8.81157	1.3836	0.383262
	19.561	29.6928	10.1319	2.70391	0.153477
	18.3766	30.0823	11.7057	4.27778	0.0515538
	18.6686	28.8428	10.1742	2.7462	0.149043
	19.149	28.8322	9.68321	2.25524	0.209462
		Avg. ∆Ct	7.42797
Cardiac MFs	Avg. Ct 36b4	Avg. Ct Mmp14	∆Ct	∆∆Ct	2^-∆∆Ct	Mean
WT	18.9999	24.8735	5.87363	-0.311372	1.24089	1.02081
	21.4566	27.4344	5.97777	-0.207228	1.15447
	23.9556	30.0102	6.05458	-0.130415	1.09461
	21.7647	28.4916	6.72697	0.54197	0.686832
	21.6383	28.0892	6.45084	0.26584	0.831715
	20.896	26.9222	6.0262	-0.158795	1.11635
MAC-Mmp14 KO	19.4183	27.0285	7.61023	1.42523	0.37236	0.362663
	21.6295	28.9098	7.28032	1.09532	0.468032
	20.1717	27.3099	7.13823	0.953228	0.516476
	21.7352	30.3605	8.62525	2.44025	0.184251
	20.4169	28.4316	8.01477	1.82977	0.28131
	20.5244	28.2095	7.68502	1.50002	0.353549
		Avg. ∆Ct	6.185
Cardiac ECs	Avg. Ct 36b4	Avg. Ct Mmp14	∆Ct	∆∆Ct	2^-∆∆Ct	Mean
WT	21.1465	25.886	4.73947	-0.472293	1.38731	1.11356
	22.3999	28.903	6.50312	1.29136	0.408565
	20.6383	26.4888	5.85045	0.638691	0.642295
	21.0793	25.7773	4.69806	-0.513703	1.42771
	21.0022	25.9907	4.98848	-0.223275	1.16738
	20.7893	25.2803	4.49098	-0.720782	1.64808
MAC-Mmp14 KO	20.6003	25.8471	5.24684	0.0350817	0.975977	1.27452
	21.2389	26.4151	5.17615	-0.0356078	1.02499
	20.733	25.995	5.26196	0.0501967	0.965805
	21.4178	26.547	5.12928	-0.0824748	1.05883
	21.1596	26.8574	5.69779	0.486032	0.713986
	20.0086	24.1432	4.13456	-1.0772	2.10993
	20.7365	25.2165	4.48002	-0.731737	1.66064
	20.9669	25.4251	4.45814	-0.753621	1.68602
		Avg. ∆Ct	5.21176
