# Supplementary material for: Macrophages promote endothelial-to-mesenchymal transition via MT1-MMP/TGFβ1 after myocardial infarction
Source: eLife. 2020 Oct 16;9:e57920. doi: 10.7554/eLife.57920 (PMC7609061; doi:10.7554/eLife.57920)
Supplement: Figure 1—figure supplement 3—source data 1. [file elife-57920-fig1-figsupp3-data1.xlsx]

## Sheet: Fig 1- Fig supplement 3A
	Progression of post-I/R LVEF (%) in WT and MAC-Mmp14 KO mice
	Day 0 WT	Day 7 WT	Day 21 WT	Day 0 MAC-Mmp14 KO	Day 7 MAC-Mmp14 KO	Day 21 MAC-Mmp14 KO
	66.33	42.67	42.67	68	47.44	58
	79.33	53.67	48.33	71	59.33	44.33
	60.67	52	44.25	72.67	65	49
	71.33	53.33	45.33	69.33	50.3	47.67
	65.3	41.33		73.33	56.33	58
	72	49.67	46	83.33	64.67	65.33
	61.7	52.67	51	76.3	54	66.7
	68	54.67	53.3	66.3	66	51
	67	48.33	43.7	70.7	72.33	66.7
	64	52.67	63	65.3	47.75	60
	64.3	55	40	69.3	56	66.3
	69.7	35.67	46	58	61	53.5
	62	52.33	48.3	69	69.67	59.7
	79	60	58.3
Mean	67.9043	50.2864	48.4754	70.1969	59.2169	57.4023
	Progression of post-I/R LVIDd (mm) in WT and MAC-Mmp14 KO mice
	Day 0 WT	Day 7 WT	Day 21 WT	Day 0 MAC-Mmp14 KO	Day 7 MAC-Mmp14 KO	Day 21 MAC-Mmp14 KO
	3.76	4.16	4.34	4.18	3.91	4.33
	3.86	4.21	4.27	3.8	4.17	4.47
	3.99	4.33	4.9	4.12	4.37	4.63
	3.83	4.47	4.8	4.15	4.67	4.67
	3.59	4.43		3.67	4.17	3.85
	3.54	4.31	4.65	3.85	3.85	3.85
	3.95	3.98	4.62	3.54	3.99	4.2
	3.74	4.2	4.24	4.05	4.05	5.11
	3.89	4.94	5.07	3.28	3.67	4
	3.67	3.86	3.77	3.69	3.71	4.22
	3.5	3.7	4.27	3.63	4.45	3.7
	4.09	4.85	5.07	4.17	4.22	4
	4	4.65	4.93	4	4.09	3.92
	3.43	4.36	4.4
Mean	3.77429	4.31786	4.56385	3.85615	4.10154	4.22692
	Progression of post-I/R LVIDs (mm) in WT and MAC-Mmp14 KO mice
	Day 0 WT	Day 7 WT	Day 21 WT	Day 0 MAC-Mmp14 KO	Day 7 MAC-Mmp14 KO	Day 21 MAC-Mmp14 KO
	2.7	3.25	3.41	2.8	3.1	3.19
	2	2.9	3.23	2.5	3	3.48
	2.7	3.45	3.94	2.6	3	3.39
	2.5	3.05	3.38	3.1	3.13	3.72
	2.5	3.7		2.4	3.14	2.81
	2.3	3.39	3.76	2.1	2.61	2.52
	2.9	3.02	3.61	2.5	3.05	2.86
	2.6	2.66	3.27	2.8	2.77	3.96
	2.7	4.02	4.18	2.2	2.35	2.74
	2.6	2.97	2.66	2.6	2.96	3.07
	2.4	2.61	3.11	2.4	3.34	2.52
	2.7	3.85	3.91	3	3.03	3.06
	2.9	3.3	3.91	2.7	2.7	2.83
	2	2.99	3.01
Mean	2.53571	3.22571	3.49077	2.59231	2.93692	3.08846

## Sheet: Fig 1- Fig supplement 3C
	% SHG			Skewness			Kurtosis
	WT	MAC-Mmp14 KO		WT	MAC-Mmp14 KO		WT	MAC-Mmp14 KO
	2	1.523		2.086	2.321		4.927	7.05
	1.962	0.422		2.285	2.559		6.093	8.772
	1.221	0.961		2.282	2.276		6.044	6.235
	3.508	0.912		1.91	2.477		3.535	8.998
	3.826	2.09		1.896	1.966		3.777	4.586
		0.413			2.564			8.507
		1.725			2.353			6.846
Mean	2.62925	1.08717		2.09325	2.36583		4.86225	7.324
