# Supplementary material for: Macrophages promote endothelial-to-mesenchymal transition via MT1-MMP/TGFβ1 after myocardial infarction
Source: eLife. 2020 Oct 16;9:e57920. doi: 10.7554/eLife.57920 (PMC7609061; doi:10.7554/eLife.57920)
Supplement: Figure 1—figure supplement 4—source data 1. [file elife-57920-fig1-figsupp4-data1.xlsx]

## Sheet: Fig 1- Fig supplement 4A
mRNA expression levels of genes related to senescence-associated secretory phenotype (SASP) and M1/M2 genes in 7-day-post-MI cardiac macrophages
	Cdkn1a	Icam1	Mmp12	Scf	Serpine1	Cd163	MerTK	Mrc1	Ym1	Ccl2	Cd86
WT	1.02393	0.78443	1.82214	0.79514	1.01833	1.28512	1.51922	0.9045	1.41323	0.9615	1.09207
	0.67335	0.74522	0.45144	0.89924	0.96709	0.75548	1.10867	1.18893	0.22819	0.75652	1.06719
	2.03422	1.74539	2.36125		2.19123		1.71095	1.04018	1.06413	1.43232	0.9909
	1.01688	1.22159	0.77913	0.89993	1.0052	0.80055	1.10277	1.02814	0.59244	0.90895	0.98674
	0.60467	0.72688	0.37438	1.00403	0.73053	0.47091	0.53032	0.92501	1.30485	1.32576	1.20298
	1.62604	1.65971	1.40394	1.165	2.1252	1.12381	0.84715	1.01294	1.04622	1.08288	0.92501
MAC-Mmp14 KO	0.69152	0.85336	1.39638	0.47446	0.32422	1.07764	1.16895	0.93525	1.34805	0.72114	0.81568
	0.70036	0.8728	0.62161	1.48626	0.71649	0.97351	0.92948	1.41647	0.43855	1.0102	1.15587
	1.49203	0.94245	1.75337	0.89688	1.43048	1.25991	0.90248	1.00205			1.01863
	0.74941	0.66569	0.33289	0.82938	0.57767	0.6152	0.64278	0.75296	0.43732	0.76308	1.05987
	0.8147	1.08828	1.38331	0.69594	0.70148	0.84455	0.88235	0.89173	1.19414	0.71791	0.68968
	1.61642	1.30779	1.79389	0.82555	2.20509	1.4119	1.25943	1.04116	1.23686	1.01171	1.12336
Mean
WT	1.16318	1.1472	1.19871	0.952668	1.3396	0.887174	1.13651	1.01662	0.94151	1.07799	1.04415
MAC-Mmp14 KO	1.01074	0.955062	1.21358	0.868078	0.992572	1.03045	0.964245	1.0066	0.930984	0.844808	0.977182

## Sheet: Fig 1- Fig supplement 4B
mRNA expression levels of genes related to senescence-associated secretory phenotype (SASP) in basal BMDMs
	Cdkn1a	Icam1	Mmp12	Scf	Serpine1
WT	0.73729	1.40601	0.74201	1.2262	1.45445
	0.99058	0.72443	0.77573	1.05667	0.53539
	0.80062	0.68855	1.88128	1.05618	1.16312
		0.73294	1.14813	0.72436
MAC-Mmp14 KO	0.75106	0.81685	1.43915	1.4337	0.42835
	0.82321	1.12888	0.74017	0.96027	1.1323
	0.62498	0.9621	0.82461	1.00906	0.75464
	0.93396	0.90521	0.91569	0.72617	1.36001
Mean
WT	0.84283	0.887983	1.13679	1.01585	1.05099
MAC-Mmp14 KO	0.783302	0.95326	0.979905	1.0323	0.918825

## Sheet: Fig1- Fig supplement 4C
mRNA expression levels of M1/M2 genes in polarised BMDMs
	Il1b	Il12	Il6	Nos2	Mcp1			Arg1	Rentla	Pdcd1	Mrc1	Igf1
WT basal	0.00784	0.00857	0.22905	0.6345	0.08502		WT basal	0.05565	0.01213	0.16557	0.872	0.72993
	0.02304	0.02749	0.00739	0.00364	0.09516			0.04879	0.01805	0.0941	1.056	0.8095
	0.00595	0.11	0.68181	0.02845	0.09138			0.04801	0.00495	0.1497	0.733	0.63655
	0.01543	0.04865	0.04099		0.08353			0.02899	0.00096	0.14487	0.66	0.86431
MAC-Mmp14 KO basal	0.01025	0.01088	0.08849	0.24025	0.22145		MAC-Mmp14 KO basal	0.04662	0.07107	0.22511	0.702	0.83549
	0.00565	0.00817	0.01359	0.01729	0.15202			0.01226	0.01142	0.18462	0.575	0.61796
	0.00914	0.05429	0.04416	0.0328	0.06749			0.07424	0.00238	0.13812	0.756	0.91176
	0.03611	0.10348	0.09136	0.09557	0.21015			0.07859	0.00489	0.07557	0.618	0.89332
WT LPS	99.2767	117.412	56.0249	38.3606	39.247		WT IL4	67.7796	845.99	29.8721	1.739	1.26878
	94.9987	207.711	87.8837	59.0511	39.7825			81.4165	979.948	22.7023	1.808	1.37708
	87.4262	146.154	73.3643	57.0691	49.8715			42.6309	710.11	27.0239	1.314	1.40065
	126.145	193.129	81.4234	53.3489	45.3589			39.5689	444.935	24.3875	1.068	1.24417
MAC-Mmp14 KO LPS	136.987	121.507	48.3315	56.7162	45.5412		MAC-Mmp14 KO IL4	83.6462	813.31	22.6941	1.494	1.17302
	67.1132	146.771	69.2811	36.6435	45.7845			44.8073	465.485	25.9963	1.583	1.12443
	42.3892	178.043	81.2004	53.3643	46.9586			45.9982	570.961	21.1807	1.362	1.2112
	77.8291	118.565	40.5077	48.7815	27.6922			70.482	1557.8	27.1147	1.251	1.39563
Mean							Mean
WT basal	0.013065	0.0486775	0.23981	0.222197	0.0887725		WT basal	0.04536	0.0090225	0.13856	0.83025	0.760073
MAC-Mmp14 KO basal	0.0152875	0.044205	0.0594	0.0964775	0.162777		MAC-Mmp14 KO basal	0.0529275	0.02244	0.155855	0.66275	0.814632
WT LPS	101.962	166.101	74.6741	51.9574	43.565		WT IL4	57.849	745.246	25.9964	1.48225	1.32267
MAC-Mmp14 KO LPS	81.0797	141.222	59.8302	48.8764	41.4941		MAC-Mmp14 KO IL4	61.2334	851.888	24.2464	1.4225	1.22607
