# Supplementary material for: Macrophages promote endothelial-to-mesenchymal transition via MT1-MMP/TGFβ1 after myocardial infarction
Source: eLife. 2020 Oct 16;9:e57920. doi: 10.7554/eLife.57920 (PMC7609061; doi:10.7554/eLife.57920)
Supplement: Figure 1—source data 1. [file elife-57920-fig1-data1.xlsx]

## Sheet: Fig 1A
mRNA relative expression in sorted cardiac macrophages from WT and MAC-Mmp14 KO mice
	Mmp14	Mmp2	Mmp9	Mmp13	Col1a1
D0	1.08175	1.7935		1.41996	0.486353
	0.939436	0.408168	0.881186	0.869272	1.29806
	0.978815	0.798328	1.11881	0.710767	1.21558
D3	12.0595	0.572675	0.659985	0.105498	1.06753
	15.3878	0.911975	0.338836	0.0520092	9.34741
	13.5085	0.95575	0.352756	0.0543192	8.0047
D7	20.1092	1.88937	0.167627	0.110508
	21.821	4.0543	0.113856	0.0664083	20.4928
	24.2292	4.87436	0.048532	0.0526076	19.5841
	24.1967		0.0666175
D28	2.63541	2.02367	0.0733003	0.446629	0.526114
	2.06193	1.43746	0.0913093	0.683337	0.681757
	0.0419385	2.07754	0.151642	0.500626	0.528743
Mean
D0	1	1	1	1	1
D3	13.6519	0.813467	0.450526	0.0706086	6.13988
D7	22.0531	3.60601	0.110005	0.0765081	20.0385
D28	1.57976	1.84622	0.105417	0.543531	0.578871

## Sheet: Fig 1C
Progression of post-MI LVEF (%) in WT and MAC-Mmp14 KO mice
Day 0 WT	Day 7 WT	Day 28 WT	Day 0 MAC-Mmp14 KO	Day 7 MAC-Mmp14 KO	Day 28 MAC-Mmp14 KO
52	35.4159	42.7923	66	46.7758	47.6179
61	29.0981	33.0277	48	40.9137	30.6523
63	24	31.408	67	51.5075	45.1981
48	6.225	9.93	39.34	22.4199	43.2142
43	12.953	10.552	61.41	6.659	28.169
67	11	21.217	64.38	15.491	15.782
47	13.923	22.773	65.32	42.452	43.553
61	30	7.663	51	7.415	16.283
64	6.916	4.47	63	54	13.776
			58	40	24.714
Mean
56.2222	18.8368	20.4259	58.345	32.7634	30.8959
Progression of post-MI LVVold (µl) in WT and MAC-Mmp14 KO mice
Day 0 WT	Day 7 WT	Day 28 WT	Day 0 MAC-Mmp14 KO	Day 7 MAC-Mmp14 KO	Day 28 MAC-Mmp14 KO
68.32	60.4436	63.8688	29.83	57.6766	65.583
40.85	49.7537	60.2661	29.69	62.4592	79.0562
38.85	59.219	59.568	39.6	42.8984	47.9908
37.62	119.371	216.069	39.34	41.6193	76.0505
64.48	103.69	120.931	61.41	57.81	76.981
43.96	87.084	68.779	64.38	72.422	81.44
35.43	73.67	76.233	65.32	40.54	41.843
44.85	66.18	70.525	51	64.686	89.272
31.58	128.724	213.242	63	40.725	40.531
			58	63.907	61.643
Mean
45.1044	83.1261	105.498	50.157	54.4743	66.0391

## Sheet: Fig 1D
Progression of post-MI infarct size and WMSI in WT and MAC-Mmp14 KO mice
Infarct size
Day 0 WT	Day 7 WT	Day 28 WT	Day 0 MAC-Mmp14 KO	Day 7 MAC-Mmp14 KO	Day 28 MAC-Mmp14 KO
0	58.3333	66.6667	0	16.6667	16.6667
0	41.6667	91.6667	0	50	33.3333
0	41.6667	66.6667	0	25	33.3333
0	83.3333	100	0	66.6667	50
0	75	66.6667	0	58.3333	75
0	66.6667	75	0	66.6667	66.6667
0	75	66.6667	0	25	33.3333
0	66.6667	75	0	75	100
0	83.3333	91.6667	0	41.6667	66.6667
			0	50	66.6667
Mean
0	65.7407	77.7778	0	47.5	54.1667
WMSI
Day 0 WT	Day 7 WT	Day 28 WT	Day 0 MAC-Mmp14 KO	Day 7 MAC-Mmp14 KO	Day 28 MAC-Mmp14 KO
1	1.66667	2.16667	1	1.33333	1.16667
1	1.58333	2.58333	1	1.66667	1.83333
1	1.83333	2.25	1	1.41667	2
1	2.58333	3.75	1	2.16667	2.08333
1	2.5	2.58333	1	1.91667	2.83333
1	2.33333	2.5	1	2.08333	2.91667
1	2.41667	2.58333	1	1.33333	1.33333
1	2.33333	2.66667	1	2.83333	3.33333
1	2.91667	3.58333	1	1.66667	2.41667
			1	2	2.08333
Mean
1	2.24074	2.74074	1	1.84167	2.2

## Sheet: Fig 1G
	% SHG			Skewness			Kurtosis
	WT	MAC-Mmp14 KO		WT	MAC-Mmp14 KO		WT	MAC-Mmp14 KO
	15.599	16.747		2.359	2.431		7.839	8.102
	18.911	15.116		2.324	2.754		7.214	10.701
	16.266	7.939		2.314	2.679		7.002	9.518
	29.081	13.4655		1.802	2.98506		3.431	11.844
	22.87	16.703		2.178	2.422		5.92	7.672
	23.514			0.889			-0.372
	24.752			0.876			-0.416
Mean	21.5704	13.9941		1.82029	2.65421		4.374	9.5674

## Sheet: Infarct size at day 1
	Infarct size			WMSI			% LVEF			LVVold (ml)
	WT	MAC-Mmp14 KO		WT	MAC-Mmp14 KO		WT	MAC-Mmp14 KO		WT	MAC-Mmp14 KO
	58.33	66.67		2.08	1.92		11.73	14.89		66.49	66.04
	33.33	66.67		1.58	2.08		9.66	27.36		49.36	48.33
	58.33	50		2.08	1.92		11.89	22.65		68.53	51.21
	66.67	58.33		2.17	2.08		21.98	26.31		71.38	53.27
	66.67	25		2.17	1.42		11.47	20.33		62.32	44.22
	66.67			2.08			13.76			54.84
	66.67			2			27.84			59.95
Mean	59.5243	53.334		59.5243	53.334		59.5243	53.334		59.5243	53.334
