# Supplementary material for: Macrophages promote endothelial-to-mesenchymal transition via MT1-MMP/TGFβ1 after myocardial infarction
Source: eLife. 2020 Oct 16;9:e57920. doi: 10.7554/eLife.57920 (PMC7609061; doi:10.7554/eLife.57920)
Supplement: Figure 2—figure supplement 1—source data 1. [file elife-57920-fig2-figsupp1-data1.xlsx]

## Sheet: Fig 2- Fig supplement 1B
	CAIX area/total infarct area
	WT	MAC-Mmp14 KO
	6.4e-05	3.6e-05
	0.000112	1.1e-05
	0.000113	2.1e-05
	2.1e-05	7.1e-05
	4.3e-05	1.7e-05
	2.9e-05	0.00013
	8.3e-05	0.000109
		8.3e-05
Mean	6.64286e-05	5.975e-05

## Sheet: Fig 2- Fig supplement 1D
	SMA+ vessels / mm2			SMA+ wall thickness (mm)
	WT	MAC-Mmp14 KO		WT	MAC-Mmp14 KO
	13.3326	13.8687		4.27469	4.17314
	25.0664	13.8855		5.95377	3.47242
	12.3309	33.0808		5.26912	4.09213
	8.06635	22.4501		5.40839	4.44271
	25.3423	16.7754		4.43214	5.08615
	20.3052	6.82836		4.99177	6.33665
	12.3274	9.07726		5.66716	4.14
Mean	16.6816	16.5666		5.14243	4.53474
