# Supplementary material for: Macrophages promote endothelial-to-mesenchymal transition via MT1-MMP/TGFβ1 after myocardial infarction
Source: eLife. 2020 Oct 16;9:e57920. doi: 10.7554/eLife.57920 (PMC7609061; doi:10.7554/eLife.57920)
Supplement: Figure 2—source data 1. [file elife-57920-fig2-data1.xlsx]

## Sheet: Fig 2B
	Vascular volume density (%)			Capillaries/mm3 tissue			ECs/mm3 vasculature volume			Capillary density			Intercapillary distance			Diffusion distance
	WT	MAC-Mmp14 KO		WT	MAC-Mmp14 KO		WT	MAC-Mmp14 KO		WT	MAC-Mmp14 KO		WT	MAC-Mmp14 KO		WT	MAC-Mmp14 KO
	13.25	13.7		306094	581480		3877881	6064001		1754.56	1928.12		8.12	6.91		11.21	9.21
	12.31	13.58		475381	619865		6010109	7240985		1098.18	2338.36		8.62	7.54		10.17	9.2
	12.33	12.73		481877	505203		4132493	5686104		795.231	1455.56		7.75	7.57		10.43	9.84
	12.49	13.19		382864	498412		5507218	5451487		1120.27	1325.39		8.84	7.23		11.4	10.2
	12.85	13.14		308850	457665		4007979	4943902		1069.78	1552.6		7.83			11.41	10.37
				424004			4413693			1367.99			7.38			10.42
Mean	12.646	13.268		396511	532525		4.65823e+06	5.8773e+06		1201	1720		8.09	7.3125		10.84	9.764

## Sheet: Fig 2D
	CAIX area/total infarct area
	WT	MAC-Mmp14 KO
	0.011059	0.012563
	0.0349	0.00619
	0.037937	0.011577
	0.010618	0.019774
	0.026761	0.010415
	0.020961	0.012854
	0.017674	0.016809
Mean	0.0228443	0.0128831
