# Supplementary material for: Macrophages promote endothelial-to-mesenchymal transition via MT1-MMP/TGFβ1 after myocardial infarction
Source: eLife. 2020 Oct 16;9:e57920. doi: 10.7554/eLife.57920 (PMC7609061; doi:10.7554/eLife.57920)
Supplement: Figure 3—source data 1. [file elife-57920-fig3-data1.xlsx]

## Sheet: Fig 3C
	Standardized MFI LAP			Standardized MFI TGFB1
	WT	MAC-Mmp14 KO		WT	MAC-Mmp14 KO
	1.77259	1.76299		0.829033	1.18187
	1.65698	1.33809		1.23913	1.41518
	0.842253	2.53667		0.62023	2.17627
	0.275246	1.79469		0.589329	2.52303
	1.00239	0.806145		1.09532	1.68061
	0.873324	2.08693		0.995949	2.32994
	0.577215	1.37128		1.44341	1.58545
				1.18759	1.81024
Mean	1	1.67097		1	1.83782

## Sheet: Fig 3D
	Latent TGFB1/ TfR (AU)
	WT	MAC-Mmp14 KO
	0.894	3.685
	1.106	2.086
	1.432	3.433
	0.568	3.549
	0.758	6.327
	1.242	1.62
		0.924
Mean	1	3.08914

## Sheet: Fig 3E
	Tgfb1 mRNA relative expression in BMDMs from WT and MAC-Mmp14 KO mice
	WT	MAC-Mmp14 KO
	0.6656	1.0323
	1.0361	1.3195
	1.2457	1.6435
	0.6445	0.9867
	1.4081	1.2026
Mean	1	1.23692

## Sheet: Fig 3G
	Arbitrary luciferase units (ALU) in HEK293 cells co-cultured with or without LPS-activated WT or MAC-Mmp14 KO BMDMs
	Ctrl	WT	MAC-Mmp14 KO
	1.13063	1.36869	1.14754
	0.942398	1.40512	1.11681
	0.870773	1.25008	1.16159
	1.0562	1.37429	0.961985
Mean	1	1.34955	1.09698

## Sheet: Fig 3H
	ALU in HEK293 cells co-cultured with or without conditioned media from LPS-activated MAC-Mmp14 KO BMDMs transduced with mock lentivirus (GFP), or lentivirus containing full-length MT1-MMP (FL) or catalytic MT1-MMP mutant (E240A)
	Ctrl	Mock LV	FL LV	E240A LV
	1.1614	0.84011	1.5698	0.728928
	0.995933	0.929666	1.66971	0.795523
	0.955714	0.901921	1.62236	0.918413
	0.886955	0.852773	1.25326	0.957387
Mean	1	0.881118	1.52878	0.850063
