# Supplementary material for: Macrophages promote endothelial-to-mesenchymal transition via MT1-MMP/TGFβ1 after myocardial infarction
Source: eLife. 2020 Oct 16;9:e57920. doi: 10.7554/eLife.57920 (PMC7609061; doi:10.7554/eLife.57920)
Supplement: Figure 4—figure supplement 2—source data 1. [file elife-57920-fig4-figsupp2-data1.xlsx]

## Sheet: Fig 4- Fig supplement 2A
mRNA expression levels of indicated genes in FBs treated with WT or MAC-Mmp14 KO BMDM supernatants (SN)
	Bax	Bclxs	Fas	Acta2	Tagln	Fn1	Postn	Col1a1	Col1a2	Col3a1	Mmp2	Mmp12	Mmp14	Tgfb1	Pdgfb	Serpine1	Tnfa	Spp1
FBs Ctrl	1.16372		1.68978	1.00199	0.811828	0.652028	0.926589	1.36329	1.14601	1.11684	1.12201	1.54907	0.991728	1.21729	1.1893	1.39894		1.29696
	1.00945	1.27435	0.665509		1.5388	1.47276	1.37232	0.905571	0.981117	1.1879	1.08874	0.309608	1.00461	1.00653	0.879396	0.836952	0.428733	1.1158
	0.826832	0.725654	0.644714	0.998006	0.649374	0.875211	0.701088	0.731141	0.872871	0.695258	0.789244	1.14133	1.00367	0.776174	0.931309	0.764106	1.57127	0.58724
	1.1271	0.941089	0.765051	1.46208	1.64443	1.22859	1.15315	0.952814	1.0198	1.30819	1.03762	0.42354	0.885983	0.852415	0.790323	0.791825	0.226482	1.36904
	0.727947	1.07534	1.26923	0.684918	0.793727	0.936853	1.01473	1.04022	1.05888	0.996165	0.969507	1.17931	1.0771	1.06785	1.1874	1.28466	1.4511	0.752191
	1.14495	0.983567	0.96572	0.853001	0.561842	0.834561	0.832122	1.00697	0.921318	0.695644	0.992876	1.39715	1.03692	1.07973	1.02228	0.923512	1.32242	0.878766
FBs + SN WT BMDMs	0.840088	0.983403	1.2884	1.0084	1.0414	1.18437	0.803626	1.51927	1.40854	1.39451	0.726066	3.36104	0.7704	0.675025	0.439538	2.51812	0.723066	1.48788
	0.863873	0.629836	1.44641	0.927956	0.972972	1.20276	0.699658	1.26732	1.23276	1.13973	0.544012	3.32669	0.549358	0.515533	0.436399	2.46368	0.541164	1.05459
	0.795059	0.79895	1.20639	0.869518	1.05046	1.35406	0.817282	0.977831	1.42393	1.29983	0.495098	3.51866	0.59764	0.678791	0.422373	2.67271	0.583452	1.36894
	1.01127	1.05979	1.0526	0.84773	0.960303	0.320197	0.966186	1.19109	1.52263	2.34427	0.840347	4.03707	0.645246	0.752062	0.42649	2.04459	0.853647	1.57286
	1.13757	0.976916	1.24847	1.51332	1.18389	0.854172	1.16759	1.18082	1.49843	1.92847	0.833004	3.5105	0.528303	0.64851	0.790789	2.01724	0.857875	1.69659
	1.16295	1.06558	1.93138	0.91444	0.987726	1.39765	1.68358	1.43171	1.65213	2.65566	1.09918	4.79233	0.556762	0.847946	0.80195	2.23223	0.881838	1.98746
FBs + SN MAC-Mmp14 KO BMDMs	0.801283	0.862342	2.00625	1.14505	0.881555	1.53572	1.09507	1.10948	1.2894	1.59216	0.795517	4.6802	0.746782	0.673033	0.608902	1.38376	1.39324	1.92078
	0.7801	0.834663	1.2559	1.16029	0.886356	1.87001	1.20934	0.944898	1.09661	1.57075	0.814791	4.06544	0.573148	0.693413	0.587035	1.70439	1.31546	1.34303
	0.807387	0.83041	1.43704	0.675406	0.849954	1.52519	1.30033	0.868244	1.12198	1.5806	0.728648	4.19533	0.596457	0.586103	0.425739	1.42939	1.30881	1.30654
	0.963975	1.01868	0.80519	0.918788	0.94231	0.345533	0.605652	1.25661	1.13234	1.84093	0.767485	3.40649	0.383134	0.47025	1.12441	1.60775	0.888276	2.13543
	0.999792	1.04488	1.07764	1.0645	0.985913	1.19045	1.14505	1.32377	1.56831	2.17748	0.764663	4.89968	0.56447	0.618873	0.629406	1.99269	0.862051	1.88221
	1.01992	1.27134	0.753668	1.09161	1.07769	1.56494	1.10017	2.3284	1.49948	2.29497	0.629647	3.24871	0.638251	0.575789	0.964279	1.64435	0.83731	2.11428
Mean
FBs Ctrl	1	1	1	1	1	1	1	1	1	1	1	1	1	1	1	1	1	1
FBs + SN WT BMDMs	0.968468	0.919079	1.36228	1.01356	1.03279	1.0522	1.02299	1.26134	1.4564	1.79375	0.756285	3.75772	0.607951	0.686311	0.552923	2.32476	0.740174	1.52805
FBs + SN MAC-Mmp14 KO BMDMs	0.895409	0.977054	1.22261	1.00927	0.937297	1.33864	1.07593	1.30523	1.28469	1.84281	0.750125	4.08264	0.583707	0.60291	0.723295	1.62705	1.10086	1.78371

## Sheet: Fig 4- Fig supplement 2B
mRNA expression levels of indicated genes in WT CMs treated with WT or MAC-Mmp14 KO BMDM supernatants (SN)
	Myh6	Myh7	Tnnt2	Nppa	Pln	Ryr2	Bax	BclXS	Fas	Bcl2a1
CMs Ctrl	1.2673	1.12595	1.24147	1.19685	1.17114	1.25789	1.06473	1.18173	0.79706	0.88263
	0.93039	0.982905	0.873715	0.960012	0.954879	0.852454	0.967165	0.87157	1.15993	1.34172
	0.802307	0.891146	0.884811	0.843136	0.873978	0.889658	0.968106	0.946702	1.04301	0.775654
	1.01457	0.862991	1.11119	0.985763	1.0284	0.926414	0.98748	0.942425	0.851985	1.1757
	1.02122	1.05537	0.991556	1.13286	1.06849	1.11011	0.99494	1.06754	1.05848	0.852441
	0.964205	1.08163	0.897254	0.88138	0.903106	0.963477	1.01758	0.990037	1.08953	0.971857
CMs + SN WT BMDMs	0.463493	0.286467	0.390836	0.541149	0.537778	0.869258	1.09205	0.633741	0.537844	1.96588
	0.662457	0.467114	0.494478	0.784132	0.671683	1.18942	1.06239	0.760323	0.601786	2.17828
	0.508799	0.353408	0.368469	0.535278	0.495535	0.905431	1.33809	0.768147	0.738952	2.31527
	0.958293	0.617498	0.602222	0.780802	0.994519	1.45119	1.33577	0.880319	0.553179	2.44686
	0.890984	0.662526	0.714742	0.906883	0.906836	1.37287	1.57263	1.10385	0.647972	1.63179
	0.921279	0.820945	0.765462	0.943067	0.785373	1.43396	0.976522	1.07703	0.783982	1.58384
CMs + SN MAC-Mmp14 KO BMDMs	0.66647	0.533022	0.485013	0.518843	0.64943	0.929663	1.24733	0.792753	0.696085	2.1796
	0.625502	0.557666	0.37547	0.501595	0.608463	0.94773	1.29582	0.811001	0.605409	2.3737
	0.672286	0.557222	0.455263	0.489149	0.632472	1.06033	1.1652	0.845501	0.670282	1.72194
	0.796272	0.482546	0.517238	0.686786	0.717185	1.37317	1.18802	0.973281	0.692611	1.57497
	0.823005	0.664961	0.599729	0.747477	0.722847	1.19897	1.33657	1.11064	0.557166	2.41
	0.80891	0.67299	0.567781	0.781949	0.749814	1.41597	1.24417	0.933127	0.873807	2.95601
Mean
CMs Ctrl	1	1	1	1	1	1	1	1	1	1
CMs + SN WT BMDMs	0.734217	0.53466	0.556035	0.748552	0.731954	1.20369	1.22957	0.870567	0.643953	2.02032
CMs + SN MAC-Mmp14 KO BMDMs	0.732074	0.578068	0.500082	0.620967	0.680035	1.1543	1.24619	0.91105	0.68256	2.2027
