# Supplementary material for: Macrophages promote endothelial-to-mesenchymal transition via MT1-MMP/TGFβ1 after myocardial infarction
Source: eLife. 2020 Oct 16;9:e57920. doi: 10.7554/eLife.57920 (PMC7609061; doi:10.7554/eLife.57920)
Supplement: Figure 4—source data 1. [file elife-57920-fig4-data1.xlsx]

## Sheet: Fig 4C
	Standardized MFI pSMAD2 MFs			Standardized MFI pSMAD2 ECs			Standardized MFI pSMAD2 MyoFBs/VSMCs
	WT	MAC-Mmp14 KO		WT	MAC-Mmp14 KO		WT	MAC-Mmp14 KO
	1.237	0		1.089	0		0.311	0
	1.759	0.73		1.603	0.526		0.555	0.146
	0.276	0.82		0.216	0.436		0.272	0.107
	0.65	0.268		0.633	0.054		0.367	0.078
	0.276	1.684		0.34	1.482		0.272	0.38
	1.609	0.192		1.813	0.123		2.92	0.215
	1.15	0		1.307	0		2.302	0.115
		0.361			0.298			0.263
Mean	0.993857	0.506875		1.00014	0.364875		0.999857	0.163

## Sheet: Fig 4E
	% pSMAD2+ MyoFBs			% pSMAD2+ VSMCs
	WT	MAC-Mmp14 KO		WT	MAC-Mmp14 KO
	36.47	34.3		32.83	14.1
	38.77	44.43		57.82	31.48
	48.57	37.6		31.94	40.43
	47.15	36.7		54.84	16.13
	55.15	41.23		39.44	39.05
	50.08	27.55		40.63	28.8
Mean	46.0317	36.9683		42.9167	28.3317
