# Supplementary material for: Macrophages promote endothelial-to-mesenchymal transition via MT1-MMP/TGFβ1 after myocardial infarction
Source: eLife. 2020 Oct 16;9:e57920. doi: 10.7554/eLife.57920 (PMC7609061; doi:10.7554/eLife.57920)
Supplement: Figure 5—figure supplement 1—source data 1. [file elife-57920-fig5-figsupp1-data1.xlsx]

## Sheet: Fig 5- Fig supplement 1B
Samples	Pecam1	Cdh5	Kdr	Tie2	Col4a2	Cdh2	Tagln	Col1a1	Col1a2	Col3a1	Zeb2	Snai1
ECs	55.8074	41.4214	19.5783	3.3041	1.9223	0.436659	0.442373	0.26858	0.315841	0.323017	0.295248	0.563344
	71.6255	75.1719	31.0184	4.47884	1.82893	0.0359463	0.124374	0.0113517	0.0130853	0.0122729	0.337868	0.354949
	39.5162	36.2156	25.0599	2.78469	1.26408	0.381965	0.355422	0.280697	0.239511	0.284902	0.111266	0.25801
EndMT cells				0.433904		1.29222		1.36922	1.00592		1.55668	1.8209
	1.33169	1.24376	0.830285	0.364325	0.713869	0.957808	2.61423	0.996548	1.09451	1.10957	1.19969	1.06015
	0.646395	0.943707	1.06461	0.443643	0.720655	1.3829	1.97752	0.917184	1.00775	1.06114	0.896659	0.960925
	0.741786	0.927304	1.04361	0.398314	0.524007	0.994692	1.21111	0.77173	0.849845	1.08122	1.00324	1.08024
MyoFBs	0.0834717	0.0628393	0.0512396	1.20013	1.23033	2.12706	1.38209	3.93236	3.52055	3.37715	3.14978	1.5458
	0.104652	0.132809	0.141035	0.70884	0.952277	2.98032	1.76205	4.44495	3.93498	3.11973	1.9596	1.57682
	0.0530992	0.0538786	0.0677972	0.684037	1.10029	2.33513	1.34243	4.10147	3.43522	3.39817	2.45721	1.50288
	0.0695007	0.0701588	0.154199	0.766882	0.88579	2.08568	1.2685	3.74885	3.25519	3.31398	2.65836	1.53844
	0.0750399	0.0267707	0.0634252		0.875372		1.44212					1.45119
