# Supplementary material for: Macrophages promote endothelial-to-mesenchymal transition via MT1-MMP/TGFβ1 after myocardial infarction
Source: eLife. 2020 Oct 16;9:e57920. doi: 10.7554/eLife.57920 (PMC7609061; doi:10.7554/eLife.57920)
Supplement: Figure 5—figure supplement 3—source data 1. [file elife-57920-fig5-figsupp3-data1.xlsx]

## Sheet: Fig 5- Fig supplement 3B
	ECs (%)			MyoFBs (%)			EndMT cells (%)
	WT	MAC-Mmp14 KO		WT	MAC-Mmp14 KO		WT	MAC-Mmp14 KO
	42.5	48		19.3	14.4		12.9	3.7
	45.7	56.9		23.8	13.3		3.24	2.64
	41.1	58.3		24.3	15.2		8.61	2.42
	38	43.3		25.4	18.5		7.15	3.32
	41.8	51.8		22.8	11.2		5.31	2.91
	35.1	63.7		21.8	12.4		8.93	2.53
	39.6	45.1		16.4	15.1		12	6.56
		39.5			21.9			8.28
Mean	40.5429	50.825		21.9714	15.25		8.30571	4.045
	ECs (cells/mg)			MyoFBs (cells/mg)			EndMT cells (cells/mg)
	WT	MAC-Mmp14 KO		WT	MAC-Mmp14 KO		WT	MAC-Mmp14 KO
	10718.4	11437.5		4876.43	3424.71		3258.01	880.982
	10297.3	23373.5		5377.54	5475.35		730.136	1084.74
	6750.39	10808.1		3993.34	2822.86		1412.83	448.33
	8967.93	16378.8		5999.67	3989.4		1689.28	1257.75
	11534.5	21139.6		6292.52	4561.11		1466.03	1185.31
	9276.63	21949.3		5763.03	4267.84		2363.05	872.299
	10799.4	13498.7		4478.41	4527.16		3272	1964.18
		5153.85			2850			1078.85
Mean	9763.5	15467.4		5254.42	3989.8		2027.33	1096.55
