# Supplementary material for: Macrophages promote endothelial-to-mesenchymal transition via MT1-MMP/TGFβ1 after myocardial infarction
Source: eLife. 2020 Oct 16;9:e57920. doi: 10.7554/eLife.57920 (PMC7609061; doi:10.7554/eLife.57920)
Supplement: Figure 5—source data 1. [file elife-57920-fig5-data1.xlsx]

## Sheet: Fig 5B
	MFs (%)			ECs (%)			MyoFBs (%)			EndMT cells (%)
	WT	MAC-Mmp14 KO		WT	MAC-Mmp14 KO		WT	MAC-Mmp14 KO		WT	MAC-Mmp14 KO
	90.6	88.5		37.6	44.5		23.3	15.9		19.9	11.3
	90.7	88.9		38.7	44.8		26.8	16.6		11.2	16.5
	91.7	79.4		49.8	54.9		23.8	9.89		9.24	9.23
	89.5	87.6		27.9	56.1		30.9	12.6		19	6.04
	87.1	77.6		46.6	72		22.2	2.12		7.85	9.15
	85.9	82.1		41.1	48.7		13.6	8.82		23.8	5.7
	88.4	84.4		27.3	43.1		15.2	14.8		35.2	10.5
	80.9	84.4		51	46		7.83	13.1		26	7.84
	86.3	81.3		36.9	51.6		18.8	11.7		11.9	8.35
	81.9	76.5		42.4	52.6		22.5	11.6		7.03	5.19
	83.7	85.8		41	40.1		17.9	14.7		14	7.41
	85.1	85.3		36.3	49.3		19.5	9.74		12.4	8.76
	75.9	81.5		45.3	64.8		15.5	11.3		7.49	4.12
	80.6	79.5		38	48.5		17.5	12.9		13.2	10.9
	84.3	80.8		39.6	39.6		14.3	18.9		21.1	10.7
	75.4	79.5		29.2	50.4		17.8	12.1		12.2	6.95
				31.9	52.7		19.9	9.44		8.86	6.8
				28.3	49.6		22.1	20.3		14.6	3.28
				35.4	39.9		16.5	10.5		9.44	9.92
Mean	84.875	82.6937		38.1211	49.9579		19.2595	12.4742		14.9689	8.34947
	MFs (cells/mg)			ECs (cells/mg)			MyoFBs (cells/mg)			EndMT cells (cells/mg)
	WT	MAC-Mmp14 KO		WT	MAC-Mmp14 KO		WT	MAC-Mmp14 KO		WT	MAC-Mmp14 KO
	3257.74	2625.63		7590.6	10425.6		3863.4	2961.82		2453.91	1776.65
	4657.32	1114.83		7938.38	9159.45		4215.88	2078.63		1315.52	1481.79
	2054.45	1561.98		7297.47	9931.56		3176.4	2193.61		2487.88	978.504
	3734.98	2489.69		8078.6	11715.6		4345.27	4294.48		2749.38	2161.41
	5576.87	2037.22		11249.6	15351.5		3859.27	3034.76		1860.38	2728.97
	5802.28	2116.53		8318.19	18374.5		3835.83	3210.92		2891.84	1169.31
	5716.51	3299.78		10244.1	9415.92		3697.29	2505.31		5445.61	2110.17
	10252.1	4886.19		9729.84	6577.71		5933.87	3149.53		4055.54	1779.83
	16129.2	5211.22		12974.3	17446		8075	4187.7		3600	2404.75
	7807.64	3989.14		6782.4	20739.3		5285.83	3712.61		3491.32	2672.51
	11623.3	3412.73		11353	6193.49		5283.73	2540.09		3027.1	410.017
		8692.77			17290			4548.57			4296.82
Mean	4400.02	2516.48		8673.85	11369		3856.19	2928.63		2743.5	1773.33
