# Supplementary material for: Macrophages promote endothelial-to-mesenchymal transition via MT1-MMP/TGFβ1 after myocardial infarction
Source: eLife. 2020 Oct 16;9:e57920. doi: 10.7554/eLife.57920 (PMC7609061; doi:10.7554/eLife.57920)
Supplement: Figure 6—figure supplement 1—source data 1. [file elife-57920-fig6-figsupp1-data1.xlsx]

## Sheet: Fig 6- Fig supplement 1B
CD31+ area (mm2)	Ctrl	+ TGFβ1	+ WT BMDMs	+ MAC-Mmp14 KO BMDMs		SMA+ area (µm2)	Ctrl	+ TGFβ1	+ WT BMDMs	+ MAC-Mmp14 KO BMDMs
	1.05211e+06	642438	686507	766270			173081	346544	278224	123556
	1.20648e+06	604897	510134	1.18103e+06			108431	484804	224465	94575.3
	941965	535664	511944	613562			195441	421197	323835	173817
	1.18212e+06	527984	708877	824847			153525	533800	191350	101790
Mean	1.09567e+06	577746	604365	846428		Mean	157619	446586	254468	123435

## Sheet: Fig 6- Fig supplement 1D
CD31+ area (mm2)	Ctrl	+ TGFβ1	+ TGFβ1 + αTGFβ1	+ WT BMDMs	+ WT BMDMs + αTGFβ1		SMA+ area (µm2)	Ctrl	+ TGFβ1	+ TGFβ1 + αTGFβ1	+ T BMDMs	+ WT BMDMs + αTGFβ1
	1.20807e+06	751989	1.00696e+06	517755	1.19925e+06			272315	483730	387321	309897	81115.6
	1.26426e+06	578112	865572	383616	920829			112763	363688	296205	161207	82391
	865000	523500	986000	508500	736500			404000	554000	401500	557500	211500
	745500	396500	698500	385000	516000			346500	773000	519000	328500	147000
	897213	640522	770012	427354	843691			190649	674109	430259	433457	129414
Mean	1.02071e+06	562525	889258	448718	843145		Mean	283894	543605	401006	339276
