# Supplementary material for: Macrophages promote endothelial-to-mesenchymal transition via MT1-MMP/TGFβ1 after myocardial infarction
Source: eLife. 2020 Oct 16;9:e57920. doi: 10.7554/eLife.57920 (PMC7609061; doi:10.7554/eLife.57920)
Supplement: Figure 6—figure supplement 2—source data 1. [file elife-57920-fig6-figsupp2-data1.xlsx]

## Sheet: Fig 6- Fig supplement 2
MAEC samples	Pecam	Kdr	Col4a2	Tagln	Acta2	Sepine1
Ctrl	0.957615	1.09071	1.05328	0.85835	0.996808	0.83202
	0.927343	0.914429	0.951324	1.17691	1.03304	1.24927
	1.11504	0.994859	0.9954	0.964745	0.970155	0.918706
+TFGb1	0.727104	0.753122	0.520046	1.20801	1.77867	2.90996
	0.586156	0.737426	0.565217	1.35022	1.92545	3.02466
	0.616794	0.746691	0.624996	1.26803	1.59734	3.03678
+WT BMDMs	0.652546	0.550862	0.569893	1.62791	2.17264	3.39286
	0.792375	0.607031	0.548698	1.66173	2.49606	3.41661
	0.715271	0.846546	0.474131	1.55988	2.52761	3.48499
+MAC-Mmp14 KO BMDMs	1.13554	1.07735	0.748985	0.491498	0.881415	1.7301
	1.04635	1.07007	0.685869	0.500845	0.809491	1.59312
	1.17624	1.28494	0.693949	0.502447	0.915513	1.80414
