# Supplementary material for: Macrophages promote endothelial-to-mesenchymal transition via MT1-MMP/TGFβ1 after myocardial infarction
Source: eLife. 2020 Oct 16;9:e57920. doi: 10.7554/eLife.57920 (PMC7609061; doi:10.7554/eLife.57920)
Supplement: Figure 6—source data 1. [file elife-57920-fig6-data1.xlsx]

## Sheet: Fig 6A
	Standardized MFI LAP			Standardized MFI TGFB1
	WT	MAC-Mmp14 KO		WT	MAC-Mmp14 KO
	0.93307	1.46924		0.908804	6.04088
	1.09322	1.17678		1.55031	5.84842
	0.847191	1.49941		1.49685	6.90691
	0.812375	2.1614		0.577358	4.35694
	1.05841	2.6525		1.64654	5.13607
	0.821275	2.79677		0	5.10531
	1.43446			0.820131
Mean	1	1.95935		1	5.56576

## Sheet: Fig 6B
	Luciferase activity (ALU) in transfected HEK293 cells co-cultured with Mφs from 7-day-post-MI WT or MAC-Mmp14 KO hearts
	Ctrl	WT	MAC-Mmp14 KO
	0.924791	1.16216	0.975731
	1.02517	1.19272	1.09794
	1.05004	1.22821	1.03595
Mean	1	1.19437	1.03654

## Sheet: Fig 6D
CD31+ area (µm2)	Ctrl	Tgbf1	WT	MAC-Mmp14 KO		SMA+ area (µm2)	Ctrl	Tgbf1	WT	MAC-Mmp14 KO
	1.09271e+06	656185	533592	1.15637e+06			48981.9	415692	224108	171305
	1.03867e+06	552345	571068	1.36807e+06			48217	293073	197741	76557.3
	1.12371e+06	991348	565198	1.25982e+06			50109.4	345307	211689	10816.7
Mean	1.08503e+06	733293	556620	1.26142e+06		Mean	49102.8	351357	211179	86226.3
